# Supplementary material for: Resonant dielectrophoresis and electrohydrodynamics for high-sensitivity impedance detection of whole-cell bacteria
Source: Royal Society of Chemistry journal article supplement (doi:10.1039/c5lc00090d), 2015-01-01
Supplement: c5lc00090d5.pdf [file c5lc00090d5.pdf]

## **Supplementary Information**

Resonant dielectrophoresis and electrohydrodynamics  
for high-sensitive impedance detection  
of whole-cell bacteria

N. Couniot, L. A. Francis, D. Flandre

# 1 Generalities

To derive the expression of electrokinetic effects for passivated electrodes, we use similar development as those indicated in [1, 2]. The general situation is represented in Fig. 1 and is assumed two-dimensional. Cylindrical coordinates are used. All parameters are defined in Section 2.5 of the manuscript and the friction factor is defined as  $\gamma = 6\pi\eta a$ , with  $\eta$  the dynamic viscosity of the electrolyte and  $a$  the bacteria radius. Resonance effects that are possibly due to the setup (cables, probes, etc.) are not considered in the following models.

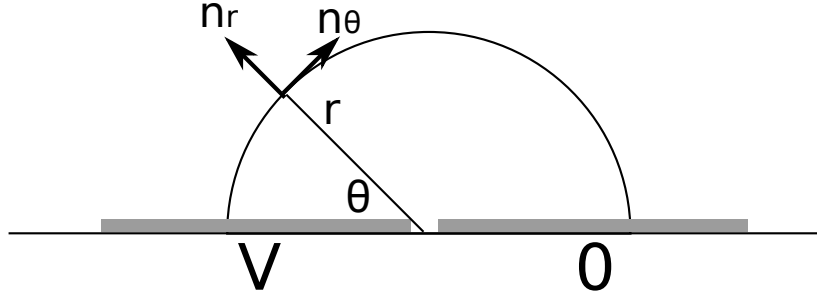

Figure 1 – Schematic view of the situation

# 2 Expression of the electrical field

Let  $\vec{E}_{ins}$  and  $\vec{E}_{sol}$  be the electric field contained in the insulating layers of thickness  $t_{ins}$  and in the electrolyte, respectively. The current conservation at the insulator-electrolyte interface gives the following relationship:  $\epsilon_{ins}\vec{E}_{ins} = (\epsilon_{sol} + \frac{\sigma_{sol}}{j\omega})\vec{E}_{sol}$ . The applied AC electric potential  $V$  is thus expressed as:

$$\begin{aligned} V &= - \int_0^{t_{ins}} E_{ins} dx - \int_{t_{ins}}^{\pi r + t_{ins}} E_{sol} dx - \int_{\pi r + t_{ins}}^{\pi r + 2t_{ins}} E_{ins} dx \\ &= 2t_{ins}E_{ins} + \pi r E_{sol} \\ &= \left[ 2 \frac{t_{ins}}{\epsilon_{ins}} \left( \epsilon_{sol} + \frac{\sigma_{sol}}{j\omega} \right) + \pi r \right] \cdot E_{sol} \end{aligned}$$

Consequently, the electric field  $\vec{E}_{sol}$  can be expressed as:

$$\vec{E}_{sol} = \frac{V}{\pi r} \cdot \underbrace{\left( \frac{1}{1 + 2 \cdot \left( \frac{\epsilon_{sol}}{\epsilon_{ins}} + \frac{\sigma_{sol}}{j\omega\epsilon_{ins}} \right) \cdot \frac{t_{ins}}{\pi r}} \right)}_{G(\omega, r)} \cdot \vec{a}_\theta$$

It can be noticed that the electric field depends on the frequency when  $t_{ins} \neq 0$ , unlike gold electrodes ( $t_{ins} = 0$ ) immersed in solution where the electric field  $\vec{E}_{sol} = \frac{V}{\pi r} \cdot \vec{a}_\theta$  is constant [1, 2]. The modulus of  $G(\omega, r)$  and  $\vec{E}_{sol}$  are equal to:

$$\begin{aligned} \|G(\omega, r)\|^2 &= \frac{1}{\left(1 + 2 \frac{\epsilon_{sol} \cdot t_{ins}}{\epsilon_{ins} \cdot \pi r}\right)^2 + \left(\frac{2\sigma_{sol} \cdot t_{ins}}{\omega\epsilon_{ins} \cdot \pi r}\right)^2} \\ \|E_{sol}\|^2 &= \frac{V^2}{\pi^2} \cdot \frac{1}{\left(r + \frac{2\epsilon_{sol} t_{ins}}{\epsilon_{ins} \pi}\right)^2 + \left(\frac{2\sigma_{sol} t_{ins}}{\omega\epsilon_{ins} \pi}\right)^2} \end{aligned}$$

### 3 Expression of the dielectrophoresis

The dielectrophoresis force can generally be expressed as [1, 2]:

$$F_{DEP}(t) = (\vec{m}(t) \cdot \vec{\nabla}) \vec{E}_{sol}(t)$$

The time-average dielectrophoresis force  $\langle \vec{F}_{DEP} \rangle$  is thus equal to:

$$\begin{aligned} \langle \vec{F}_{DEP} \rangle &= \frac{1}{2} \cdot \mathbb{R}[(\vec{m}(\omega) \cdot \vec{\nabla}) \vec{E}_{sol}^*] \\ &= \frac{1}{2} \cdot \mathbb{R}[(4\pi\epsilon_{sol} \cdot a^3 f_{CM}(\omega) \vec{E}_{sol} \cdot \vec{\nabla}) \vec{E}_{sol}(\omega)^*] \\ &= 2\pi\epsilon_{sol} \cdot a^3 \cdot \mathbb{R} \left[ f_{CM}(\omega) \frac{\vec{\nabla} \{ \vec{E}_{sol} \cdot \vec{E}_{sol}^* \}}{2} \right] \\ &= \pi\epsilon_{sol} \cdot a^3 \cdot \mathbb{R} \left[ f_{CM}(\omega) \vec{\nabla} |\vec{E}_{sol}|^2 \right] \end{aligned}$$

where  $f_{CM}$  is the Clausius-Mossoti factor. As  $|\vec{E}_{sol}|^2$  is always a real number (even if  $\vec{E}_{sol}$  is complex), we get:

$$\begin{aligned} \langle \vec{F}_{DEP} \rangle &= \pi\epsilon_{sol} a^3 \cdot \mathbb{R}\{f_{CM}(\omega)\} \cdot \vec{\nabla} |\vec{E}_{sol}|^2 \\ &= \pi\epsilon_{sol} a^3 \cdot \mathbb{R}\{f_{CM}(\omega)\} \cdot \frac{\partial |\vec{E}_{sol}|^2}{\partial r} \cdot \vec{a}_r \\ &= -\frac{2}{\pi} \cdot a^3 V^2 \epsilon_{sol} \cdot \mathbb{R}\{f_{CM}(\omega)\} \cdot \left( \frac{r + 2 \frac{\epsilon_{sol} \cdot t_{ins}}{\epsilon_{ins} \cdot \pi}}{r^4} \right) \cdot \|G(\omega, r)\|^4 \cdot \vec{a}_r \end{aligned}$$

The resulting bacteria speed is computed as follows:

$$\begin{aligned} \langle \vec{v}_{DEP} \rangle &= \frac{\langle \vec{F}_{DEP} \rangle}{\gamma} \\ &= -\frac{1}{3\pi^2 \eta} \cdot a^2 V^2 \epsilon_{sol} \cdot \mathbb{R}\{f_{CM}(\omega)\} \cdot \left( \frac{r + 2 \frac{\epsilon_{sol} \cdot t_{ins}}{\epsilon_{ins} \cdot \pi}}{r^4} \right) \cdot \|G(\omega, r)\|^4 \cdot \vec{a}_r \\ &= -\frac{a^2 V^2 \epsilon_{sol} \cdot \mathbb{R}\{f_{CM}(\omega)\} \cdot \left( r + 2 \frac{\epsilon_{sol} \cdot t_{ins}}{\epsilon_{ins} \cdot \pi} \right)}{3\pi^2 \eta \cdot \left[ \left( r + 2 \frac{\epsilon_{sol} \cdot t_{ins}}{\epsilon_{ins} \cdot \pi} \right)^2 + \left( \frac{2\sigma_{sol} t_{ins}}{\omega \epsilon_{ins} \pi} \right)^2 \right]^2} \cdot \vec{a}_r \\ &= -\frac{a^2 V^2 \epsilon_{sol} \cdot \mathbb{R}\{f_{CM}(\omega)\}}{3\pi^2 \eta \cdot \left( r + 2 \frac{\epsilon_{sol} \cdot t_{ins}}{\epsilon_{ins} \cdot \pi} \right)^3 \left[ 1 + \left( \frac{2\sigma_{sol} t_{ins}}{\omega (r \epsilon_{ins} \pi + 2\epsilon_{sol} t_{ins})} \right)^2 \right]^2} \cdot \vec{a}_r \end{aligned}$$

As  $\mathbb{R}\{f_{CM}(\omega)\}$  is positive, the speed is directed towards the sensor centre and positive-dielectrophoresis occurs then.

## 4 Expression of the AC-electroosmosis

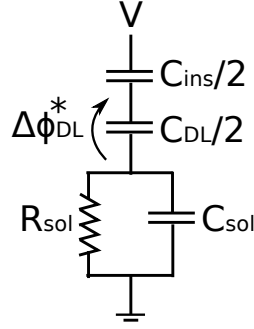

**Figure 2** – AC representation of the system complex impedance.

Based on Fig. 2 and the expression of the series capacitance  $C_s = [C_{ins}^{-1} + C_{DL}^{-1}]^{-1}$ , the voltage drop across one double layer is:

$$\begin{aligned}
 \Delta\phi_{DL} &= \frac{\Delta\phi_{DL}^*}{2} \\
 &= \frac{1}{2} \cdot \frac{I_{tot}}{j\omega C_{DL}/2} \\
 &= \frac{1}{2} \cdot \frac{\left[ (G_{sol} + j\omega C_{sol})^{-1} + (j\omega C_s/2)^{-1} \right]^{-1}}{j\omega C_{DL}/2} \cdot V \\
 &= \frac{1}{2} \cdot \frac{1}{C_{DL}/C_s} \cdot \frac{V}{1 + \frac{j\omega C_s/2}{G_{sol} + j\omega C_{sol}}} \\
 &= \frac{1}{2} \cdot \frac{1}{C_{DL}/C_s} \cdot \frac{V}{1 + \frac{j\omega C_s/2 \cdot (G_{sol} - j\omega C_{sol})}{G_{sol}^2 + \omega^2 C_{sol}^2}} \\
 &= \frac{1}{2} \cdot \frac{1}{C_{DL}/C_s} \cdot \frac{V}{(1 + \omega^2 \tau_1 \tau_2) + j\omega \tau_1}
 \end{aligned}$$

avec  $\tau_1 \triangleq \frac{G_{sol} C_s/2}{G_{sol}^2 + \omega^2 C_{sol}^2} = \frac{\pi r \cdot \sigma_{sol} C_s/2}{\sigma_{sol}^2 + \omega^2 \epsilon_{sol}^2}$  and  $\tau_2 \triangleq \frac{C_{sol}}{G_{sol}} = \frac{\epsilon_{sol}}{\sigma_{sol}}$ , since  $C_{DL} = \epsilon_{sol}/\lambda_D$ ,  $C_{ins} = \epsilon_{ins}/t_{ins}$ ,  $C_{sol} = \epsilon_{sol}/(\pi r)$ ,  $G_{sol} = \sigma_{sol}/(\pi r)$ ,  $C_s = \frac{\epsilon_{sol} \epsilon_{ins}}{t_{ins} \epsilon_{sol} + \lambda_D t_{ins}}$ . Thus,

$$|\Delta\phi_{DL}|^2 = \frac{1}{4(C_{DL}/C_s)^2} \cdot \frac{V^2}{\omega^2 \tau_1^2 + (1 + \omega^2 \tau_1 \tau_2)^2}$$

Therefore:

$$\begin{aligned}
 \frac{\partial |\Delta\phi_{DL}|^2}{\partial r} &= \frac{\partial |\Delta\phi_{DL}|^2}{\partial \tau_1} \cdot \frac{\partial \tau_1}{\partial r} \\
 &= -\frac{V^2 \omega^2}{2(C_{DL}/C_s)^2 r} \cdot \frac{(\tau_1 + \tau_2) \tau_1 + \omega^2 \tau_1^2 \tau_2^2}{(\omega^2 \tau_1^2 + (1 + \omega^2 \tau_1 \tau_2)^2)^2}
 \end{aligned}$$

Finally, the slip velocity inside the electrical double layer is approximated by [3]:

$$\begin{aligned}
 \vec{v}_{slip} &\triangleq \frac{\epsilon_{sol}}{2\eta} \cdot \Lambda \cdot \mathbb{R}\{\Delta\phi_{DL} \cdot \vec{E}_t^*\} \\
 &= -\frac{\epsilon_{sol}}{2\eta} \cdot \Lambda \cdot \mathbb{R}\left\{\Delta\phi_{DL} \cdot \frac{\partial \Delta\phi_{DL}^*}{\partial r}\right\} \cdot \vec{a}_r
 \end{aligned}$$

where  $\Lambda = \frac{C_{stern}}{C_{stern} + C_{DL}} \simeq 0.25$  is an empirical factor with  $C_{stern}$  the Stern capacitance [2]. Because  $c \cdot \partial c^* / \partial r = c^* \cdot \partial c / \partial r = 0.5 \cdot \partial(c \cdot c^*) / \partial r = 0.5 \cdot \partial|c|^2 / \partial r$  for all complex  $c$ , the following formula is finally obtained:

$$\begin{aligned}\vec{v}_{slip} &= -\frac{\varepsilon_{sol}}{4\eta} \cdot \Lambda \cdot \Re\left\{\frac{\partial|\Delta\phi_{DL}|^2}{\partial r}\right\} \cdot \vec{a}_r \\ &= -\frac{\varepsilon_{sol}}{4\eta} \cdot \Lambda \cdot \frac{\partial|\Delta\phi_{DL}|^2}{\partial r} \cdot \vec{a}_r \\ &= \frac{V^2\omega^2\varepsilon_{sol}\Lambda}{8\eta(C_{DL}/C_s)^2r} \cdot \frac{(\tau_1 + \tau_2)\tau_1 + \omega^2\tau_1^2\tau_2^2}{\left(\omega^2\tau_1^2 + (1 + \omega^2\tau_1\tau_2)^2\right)^2} \cdot \vec{a}_r\end{aligned}$$

It is important to remember that  $\vec{v}_{slip}$  is only a slip velocity which exists only at the electrode surface, so that  $\vec{a}_r$  is parallel to  $\vec{a}_x$ .

## 5 Expression of the electrothermal flow

To estimate the electrothermal flow, it is required to evaluate the increase of the local temperature induced by the electric field  $\vec{E}_{sol}$ . The Poisson equation gives:  $-\sigma_{sol}E_{sol}(t)^2 = -k\vec{\nabla}^2T(t)$ . Since  $E_{sol}(t) = E_{sol}\cos(\omega t)$ , we have:  $E_{sol}(t)^2 = \frac{E_{sol}^2}{2} \cdot (1 + \cos(2\omega t)) = E_{sol,RMS}^2 \cdot (1 + \cos(2\omega t))$ . The following relationship is obtained by neglecting AC terms:

$$\begin{aligned}-\sigma_{sol}E_{sol,RMS}^2 &= k\vec{\nabla}^2T \\ &= \frac{k}{r}\frac{\partial}{\partial r}\left(r\frac{\partial T}{\partial r}\right) + \frac{k}{r^2}\frac{\partial^2 T}{\partial \theta^2}\end{aligned}$$

with  $E_{sol,RMS} = \frac{V_{RMS}}{\pi r} \cdot G(\omega, r)$ . A particular solution  $T(r, \theta)$  to this equation was not found, mainly because of the variation of  $G(\omega, r)$  with  $r$ . By assuming  $G(\omega, r) = G(\omega)$ , it is possible to find a particular solution:  $T(\theta) = -\frac{\sigma_{sol}}{k} \cdot \frac{V_{RMS}^2 \cdot G(\omega)^2}{2\pi} \left(\frac{\theta^2}{\pi} - \theta\right)$ . The correctness of the approximation  $G(\omega, r) = G(\omega)$  was numerically verified for  $f \geq 130$  Hz at  $\sigma_{sol} = 1.8$  mS/m, for  $f \geq 1.3$  kHz at  $\sigma_{sol} = 18$  mS/m, for  $f \geq 13$  kHz at  $\sigma_{sol} = 180$  mS/m and for  $f \geq 130$  kHz at  $\sigma_{sol} = 1.8$  mS/m. In other words, it is required that  $f/\sigma_{sol} \geq 72$  (kHz.m)/S, otherwise the proposed particular solution cannot be used. When this condition is satisfied,  $\frac{k}{r}\frac{\partial}{\partial r}\left(r\frac{\partial T}{\partial r}\right) \ll \frac{k}{r^2}\frac{\partial^2 T}{\partial \theta^2}$  and the approximation  $G(\omega, r) = G(\omega)$  is correct.

With this assumption,  $\vec{\nabla}T = \frac{1}{r} \cdot \frac{\partial T(\theta)}{\partial \theta} \vec{a}_\theta = -\frac{\sigma_{sol}}{kr} \cdot \frac{V_{RMS}^2 \cdot G(\omega, r)^2}{2\pi} \left(\frac{2\theta}{\pi} - 1\right) \vec{a}_\theta$ . Starting

from Coulomb equation like in [1], the force exerted on the fluid can be expressed as:

$$\begin{aligned}
\langle \vec{F}_E \rangle &= \frac{1}{2} \Re \left\{ \left[ \left( \frac{\sigma_{sol} \vec{\nabla} \epsilon_{sol} - \epsilon_{sol} \vec{\nabla} \sigma_{sol}}{\sigma_{sol} + j\omega \epsilon_{sol}} \right) \vec{E}_0 \right] \vec{E}_0^* \right\} - \frac{1}{4} \vec{E}_0 \cdot \vec{E}_0^* \vec{\nabla} \epsilon_{sol} \\
&= \left[ \frac{1}{2} \frac{\sigma_{sol} \cdot (\sigma_{sol} \vec{\nabla} \epsilon_{sol} - \epsilon_{sol} \vec{\nabla} \sigma_{sol})}{\sigma_{sol}^2 + \omega^2 \epsilon_{sol}^2} - \frac{1}{4} \vec{\nabla} \epsilon_{sol} \right] \cdot E_0^2 \\
&= \frac{1}{2} \left[ \left( \frac{\frac{1}{\epsilon_{sol}} \vec{\nabla} \epsilon_{sol} - \frac{1}{\sigma_{sol}} \vec{\nabla} \sigma_{sol}}{1 + (\omega \epsilon_{sol} / \sigma_{sol})^2} - \frac{1}{2 \epsilon_{sol}} \vec{\nabla} \epsilon_{sol} \right) \cdot \epsilon_{sol} E_0^2 \right] \\
&= - \underbrace{\left[ \frac{-\frac{T}{\epsilon_{sol}} \frac{\partial \epsilon_{sol}}{\partial T} + \frac{T}{\sigma_{sol}} \frac{\partial \sigma_{sol}}{\partial T}}{1 + (\omega \epsilon_{sol} / \sigma_{sol})^2} + \frac{T}{2 \epsilon_{sol}} \frac{\partial \epsilon_{sol}}{\partial T} \right]}_{M(\omega, T)} \cdot \frac{\epsilon_{sol} E_{RMS}^2}{T} \cdot \vec{\nabla} T \\
&= -M(\omega, T) \cdot \frac{\epsilon_{sol} \sigma_{sol} V_{RMS}^4 G(\omega, r)^4}{2k\pi^3 r^3 T} \cdot \left(1 - \frac{2\theta}{\pi}\right) \cdot \vec{a}_\theta \\
&= -M(\omega, T) \cdot \frac{\epsilon_{sol} \sigma_{sol} V^4 G(\omega, r)^4}{8k\pi^3 r^3 T} \cdot \left(1 - \frac{2\theta}{\pi}\right) \cdot \vec{a}_\theta
\end{aligned}$$

To compute the fluid speed, we use the Stokes equation:  $\vec{v}_E \approx 0.13 \cdot \langle \vec{F}_E \rangle r^2 / \eta$ , as Eq. 32 in [1]:

$$\begin{aligned}
\vec{v}_E(\theta) &= -0.13 \cdot M(\omega, T) \cdot \frac{\epsilon_{sol} \sigma_{sol} V^4 G(\omega)^4}{8k\pi^3 r \eta T} \cdot \left(1 - \frac{2\theta}{\pi}\right) \cdot \vec{a}_\theta \\
&\approx -5 \cdot 10^{-4} \cdot M(\omega, T) \cdot \frac{\epsilon_{sol} \sigma_{sol} V^4 G(\omega)^4}{k\eta r T} \cdot \left(1 - \frac{2\theta}{\pi}\right) \cdot \vec{a}_\theta
\end{aligned}$$

## References

- [1] A. Ramos, H. Morgan, N. G. Green, and A. Castellanos, "AC electrokinetics: a review of forces in microelectrode structures," *J. Phys. D: Appl. Phys.*, vol. 31, no. 18, p. 2338, 1998.
- [2] A. Castellanos, A. Ramos, A. Gonzalez, N. G. Green, and H. Morgan, "Electrohydrodynamics and dielectrophoresis in microsystems: scaling laws," *J. Phys. D: Appl. Phys.*, vol. 36, no. 20, p. 2584, 2003.
- [3] A. González, A. Ramos, N. Green, A. Castellanos, and H. Morgan, "Fluid flow induced by nonuniform ac electric fields in electrolytes on microelectrodes. II. A linear double-layer analysis," *Phys Rev E Stat Phys Plasmas Fluids Relat Interdiscip Topics*, vol. 61, pp. 4019–4028, Apr. 2000.
